# Supplementary material for: Bioassay-Guided Fractionation Leads to the Detection of Cholic Acid Generated by the Rare Thalassomonas sp.
Source: MDPI journal article supplement (doi:10.3390/md21010002), 2022-12-20
Supplement: s1 [file s1]

# Supplementary Material: Bioassay-Guided Fractionation Leads to the Detection of Cholic Acid Generated by the Rare *Thalassomonas* sp.

Table S1:  $^1\text{H}$  and  $^{13}\text{C}$ -NMR data for 3-oxo cholic acid in acetonitrile- $\text{d}_3$

| 3-oxo Cholic acid (2) |                            |                                           |                                |
|-----------------------|----------------------------|-------------------------------------------|--------------------------------|
| Position              | $\delta_{\text{C}}$ , Type | $\delta_{\text{H}}$ , (J in Hz)           | $\delta_{\text{OH}}$ (J in Hz) |
| 1                     | 36.51, CH <sub>2</sub>     | 1.37 (td, $J = 13.2, 11.2$ Hz, 3H)        |                                |
| 2                     | 36.52, CH <sub>2</sub>     | 2.10 (ddd, $J = 15.9, 9.8, 6.4$ Hz, 1H)   |                                |
| 3                     | 212.05, C                  |                                           |                                |
| 4                     | 45.36, CH <sub>2</sub>     | 2.07 (dt, $J = 14.2, 5.6, 3.4$ Hz, 1H)    |                                |
| 5                     | 43.33, CH                  | 1.75 (ddd, $J = 14.2, 5.2, 3.0$ Hz, 1H)   |                                |
| 6                     | 33.70, CH <sub>2</sub>     | 1.52 (dt, $J = 14.6, 2.2$ Hz, 1H)         |                                |
| 7                     | 67.46, CH                  | 3.81 (t, $J = 3.0$ Hz, 1H)                | 3.77                           |
| 8                     | 39.55, C                   |                                           |                                |
| 9                     | 27.01, CH                  | 2.33 (ddt, $J = 35.0, 17.8, 5.6$ Hz, 1H)  |                                |
| 10                    | 34.73, C                   |                                           |                                |
| 11                    | 28.70, CH <sub>2</sub>     | 1.62 (tdd, $J = 12.4, 10.1, 2.9$ Hz, 3H)  |                                |
| 12                    | 72.05, CH                  | 3.97 (t, $J = 3.0$ Hz, 1H)                | 3.94                           |
| 13                    | 46.26, C                   |                                           |                                |
| 14                    | 41.71, CH                  | 1.87 ((tdd, $J = 14.6, 5.6, 3.4$ Hz, 1H)  |                                |
| 15                    | 22.83CH <sub>2</sub>       | 1.10 (qd, $J = 12.0, 6.1$ Hz, 1H)         |                                |
| 16                    | 27.24, CH <sub>2</sub>     | 1.32 (tdd, $J = 12.2, 10.2, 3.4$ Hz, 3H)  |                                |
| 17                    | 46.72, CH                  | 1.78 (d, $J = 6.5$ )                      |                                |
| 18                    | 21.12, CH <sub>3</sub>     | 1.01 (s, 3H)                              |                                |
| 19                    | 11.92, CH <sub>3</sub>     | 0.54 (s, 3H)                              |                                |
| 20                    | 16.60, CH <sub>3</sub>     | 0.59 (d, $J = 6.5$ Hz, 3H)                |                                |
| 21                    | 35.20, CH <sub>2</sub>     | 1.42 (tdd, $J = 12.4, 9.8, 2.6$ Hz, 3H)   |                                |
| 22                    | 30.82, CH <sub>2</sub>     | 1.34 (ddd, $J = 15.5, 10.2, 5.1$ Hz, 1H)  |                                |
| 23                    | 30.27, CH <sub>2</sub>     | 2.23 (ddd, $J = 15.5, 10.2, 5.1$ Hz, 1H), |                                |
| 24                    | 174.61, C                  |                                           |                                |

Table S2: Mobile phase gradient used for Xterra RP C18 column in the first round of purification

| Time (minutes) | Flowrate (ml/minutes) | Mobile phase A % | Mobile phase B % |
|----------------|-----------------------|------------------|------------------|
| 0              | 6                     | 80               | 20               |
| 2              | 6                     | 80               | 20               |
| 30             | 6                     | 0                | 100              |
| 40             | 6                     | 0                | 100              |

Table S3: Mobile phase gradient used for X-Select Fluoro-phenyl column in the second round of purification

| Time (minutes) | Flowrate (ml/minutes) | Mobile phase A % | Mobile phase B % |
|----------------|-----------------------|------------------|------------------|
|----------------|-----------------------|------------------|------------------|

|    |   |    |     |
|----|---|----|-----|
| 0  | 6 | 75 | 25  |
| 10 | 6 | 0  | 100 |
| 25 | 6 | 0  | 100 |

Table S4: Mobile phase gradient used for Agilent Poroshell C18 column

| Time (minutes) | Flowrate (ml/minutes) | Mobile phase A % | Mobile phase B % |
|----------------|-----------------------|------------------|------------------|
| 0              | 0.3                   | 70               | 30               |
| 0.30           | 0.3                   | 70               | 30               |
| 3              | 0.3                   | 10               | 90               |
| 4              | 0.3                   | 10               | 90               |
| 4.1            | 0.3                   | 70               | 30               |
| 8.6            | 0.3                   | 70               | 30               |

Table S5: Mobile phase multi-step gradient used for Waters nanoEase (Zenfit) M/Z Peptide CSH C18 column

| Time (minutes) | Flowrate (ml/minutes) | Mobile phase A % | Mobile phase B % |
|----------------|-----------------------|------------------|------------------|
| 0.00           | 0.3                   | 95               | 5                |
| 4.00           | 0.3                   | 95               | 5                |
| 24.00          | 0.3                   | 10               | 90               |
| 34.00          | 0.3                   | 10               | 90               |
| 34.10          | 0.3                   | 95               | 5                |
| 49.10          | 0.3                   | 95               | 5                |

Table S6: Enzymes involved in the production of the isoprenoid precursors IPP and DMAPP using the non-mevalonate pathway identified on the genomes of the *Thalassomonas* sp.

| Enzyme          | <i>T. actiniarum</i> | <i>T. viridans</i> | <i>T. haliotis</i> |
|-----------------|----------------------|--------------------|--------------------|
| <b>dxs</b>      | TACT_05675           | TVIR_06100         | THAL_05520         |
| <b>ispA</b>     | TACT_05680           | TVIR_06105         | THAL_05525         |
| <b>ispB</b>     | TACT_02500           | TVIR_27275         | THAL_02435         |
| <b>ispC/dxr</b> | TACT_20775           | TVIR_08630         | THAL_19605         |
| <b>ispD</b>     | TACT_05175           | TVIR_05590         | THAL_05060         |
| <b>ispE</b>     | TACT_20975           | TVIR_08425         | THAL_19810         |
| <b>ispF</b>     | TACT_05180           | TVIR_05595         | THAL_05065         |
| <b>ispG</b>     | TACT_04395           | TVIR_04815         | THAL_04310         |
| <b>ispH</b>     | TACT_22380           | TVIR_06575         | THAL_21275         |

Table S7: Name, accession number and descriptions of enzymes from the Ntn-hydrolase superfamily used for construction of the phylogenetic tree.

| Name       | Accession number | Description                                                                 |
|------------|------------------|-----------------------------------------------------------------------------|
| PfmA       | ASS36259.1       | AHL acylase, partial [Pseudoalteromonas flavipulchra JG1]                   |
| AiiC       | BAB75623.1       | all3924 [Nostoc sp. PCC 7120 = FACHB-418]                                   |
| HacB       | AAAY39885.1      | Penicillin amidase [Pseudomonas syringae pv. syringae B728a]                |
| QuiP       | AAG04421.1       | QuiP [Pseudomonas aeruginosa PAO1]                                          |
| EcPGA      | sp P06875.2      | PAC_ECOLX Penicillin G acylase subunit alpha                                |
| KcPGA      | sp P07941.1      | PAC_KLUCR Penicillin G acylase subunit alpha                                |
| PrPGA      | AAP86197.1       | penicillin G amidase [Providencia rettgeri]                                 |
| AcPGA      | AAAY25991.1      | penicillin G acylase [Achromobacter sp. CCM 4824]                           |
| AfPGA      | AAB71221.1       | penicillin G acylase precursor [Alcaligenes faecalis]                       |
| BmPGA      | sp Q60136.1      | PAC_PRIMG Penicillin G acylase subunit alpha                                |
| AvPGA      | sp P31956.1      | PAC_RHIVS Penicillin G acylase subunit alpha                                |
| AibP       | AAL53453.1       | penicillin acylase [Brucella melitensis bv. 1 str. 16M]                     |
| AiiD       | AAO41113.1       | acy-homoserine lactone acylase [Ralstonia sp. XJ12B]                        |
| Aac        | WP_011002462.1   | MULTISPECIES: penicillin acylase family protein [Ralstonia]                 |
| QqaR       | WP_010889514.1   | N-acyl homoserine lactone acylase QqaR [Deinococcus radiodurans]            |
| MacQ       | BAV56778.1       | N-Acyl-L-homoserine lactone acylase [Acidovorax sp. MR-S7]                  |
| pvdQ       | AAG05773.1       | 3-oxo-C12-homoserine lactone acylase PvdQ [Pseudomonas aeruginosa PAO1]     |
| HacA       | AAAY37014.1      | Peptidase S45, penicillin amidase [Pseudomonas syringae pv. syringae B728a] |
| AhlM       | AAT68473.1       | N-acylhomoserine lactone-degrading acylase [Streptomyces sp. M664]          |
| SsCLA      | BAD07025.1       | cyclic lipopeptide acylase [Streptomyces sp. FERM BP-5809]                  |
| SIPA       | AAU09670.1       | penicillin V acylase precursor [Streptomyces lavendulae subsp. lavendulae]  |
| SmPVA      | BAF51977.1       | penicillin V acylase [Streptomyces mobaraensis]                             |
| AuAAC      | WP_043523659.1   | acylase [Actinoplanes utahensis]                                            |
| Aac        | BAF94155.1       | acy-homoserine lactone acylase [Shewanella sp. MIB015]                      |
| AmiE       | BAP18758.1       | acylhomoserine lactone acylase [Acinetobacter sp. Ooi24]                    |
| AtPVA      | pdb 5J9R         | C Chain C, Choloylglycine hydrolase                                         |
| PaPVA      | pdb 4WL2         | H Chain H, Putative exported choloylglycine hydrolase                       |
| EfBSH      | pdb 4WL3         | D Chain D, Bile salt hydrolase                                              |
| LgBSH      | WP_020806888     | MULTIPSECIES: choloylglycine hydrolase                                      |
| CpCBAH-1   | P54965           | B chain B, bile salt hydrolase                                              |
| BIBSH      | pdb 2HF0         | B Chain B, Bile salt hydrolase                                              |
| BspPVA     | pdb 3PVA         | H Chain H, Protein (penicillin V Acylase)                                   |
| THAL_08470 |                  | <i>T. haliotis</i> , predicted AHL acylase                                  |
| TACT_08755 |                  | <i>T. actiniarum</i> , predicted AHL acylase                                |
| TVIR_20855 |                  | <i>T. viridans</i> , predicted AHL acylase                                  |
| THAL_06600 |                  | <i>T. haliotis</i> , predicted AHL acylase                                  |
| TACT_06920 |                  | <i>T. actiniarum</i> , predicted AHL acylase                                |

TVIR\_22915  
TVIR\_31235  
TACT\_32120

*T. viridans*, predicted AHL acylase  
*T. viridans*, predicted AHL acylase  
*T. actiniarum*, predicted AHL acylase

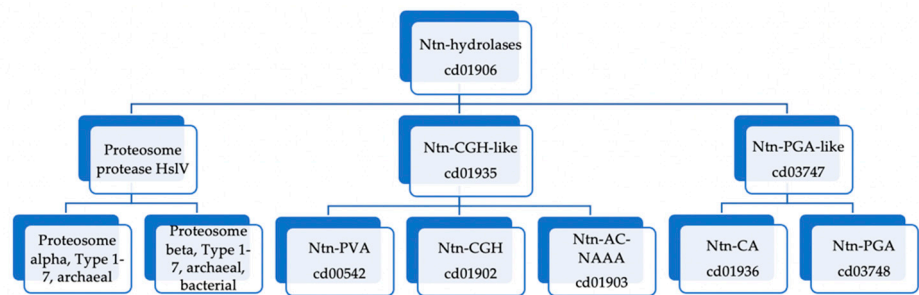

Figure S1: Enzyme Subfamilies belonging to the Ntn- hydrolase superfamily (NCBI).

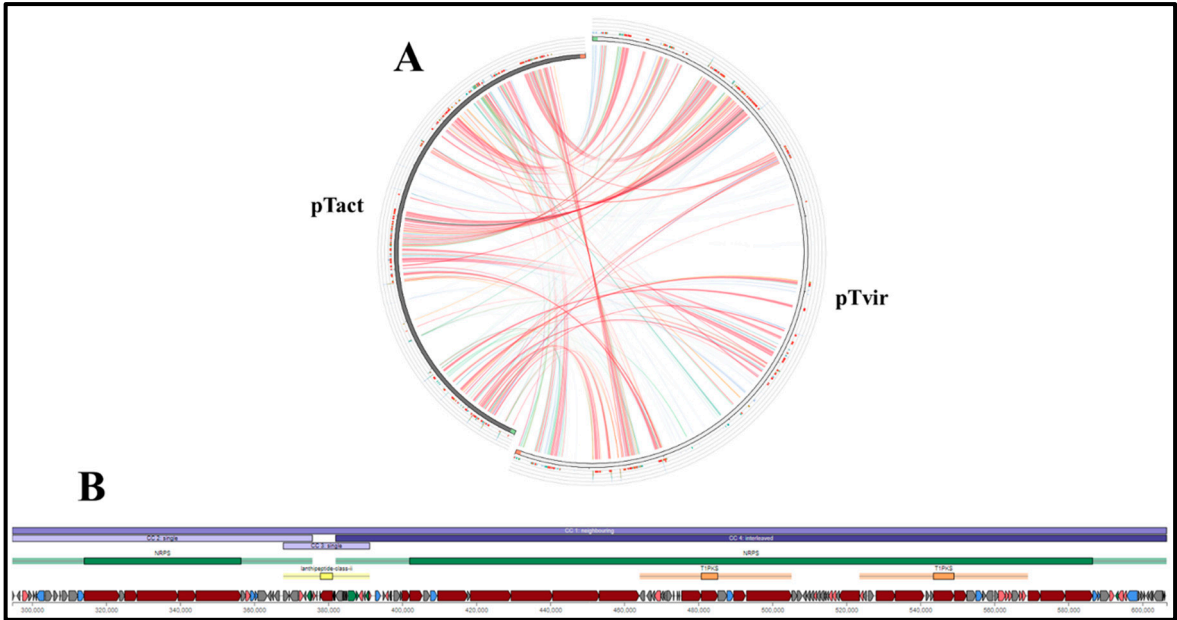

Figure S2: A) BLASTn based comparison between pTact and pTvir chromids. Ribbons are coloured according to E-value. B) 300kB BGC located on pTvir chromid.

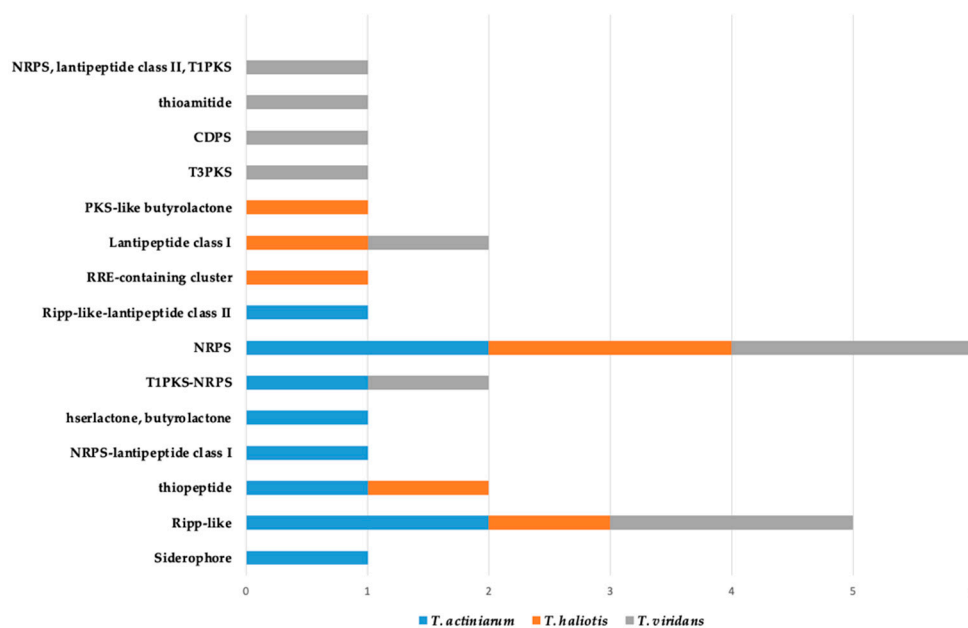

Figure S3: Count of various biosynthetic gene cluster types on the chromosomes and chromids of the *Thalassomonas* species predicted by antiSMASH v6.0.1.

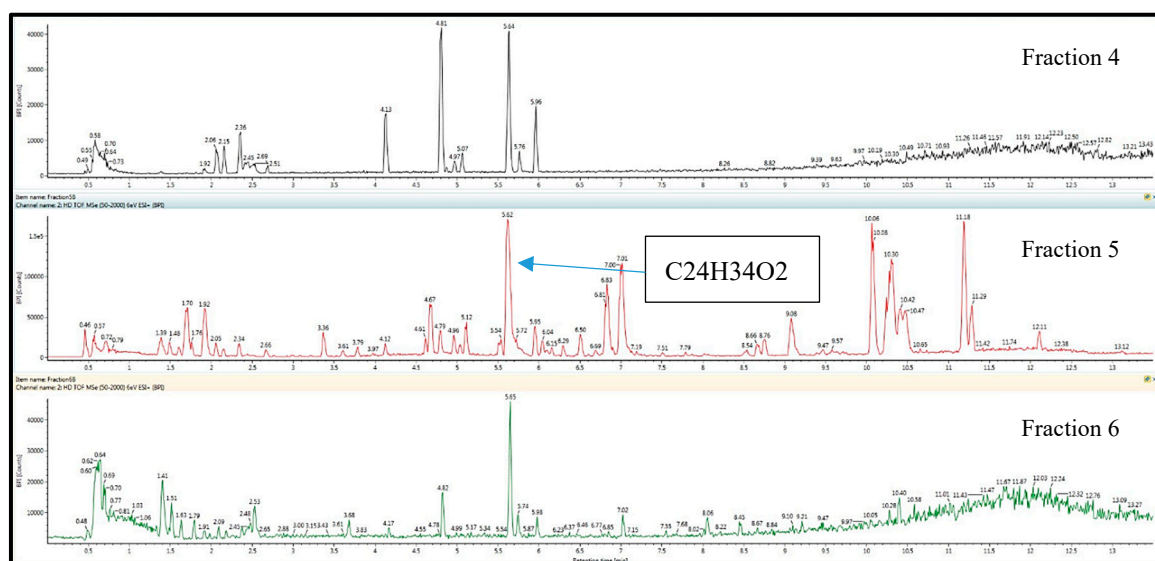

Figure S4: BPI chromatogram of active fraction 5 and inactive fractions 4 and 6 analysed in positive ionization using UHPLC-HR-MS. Compound 1 with elemental composition C<sub>24</sub>H<sub>34</sub>O<sub>2</sub> was significantly more abundant in the active fraction than the inactive fraction.

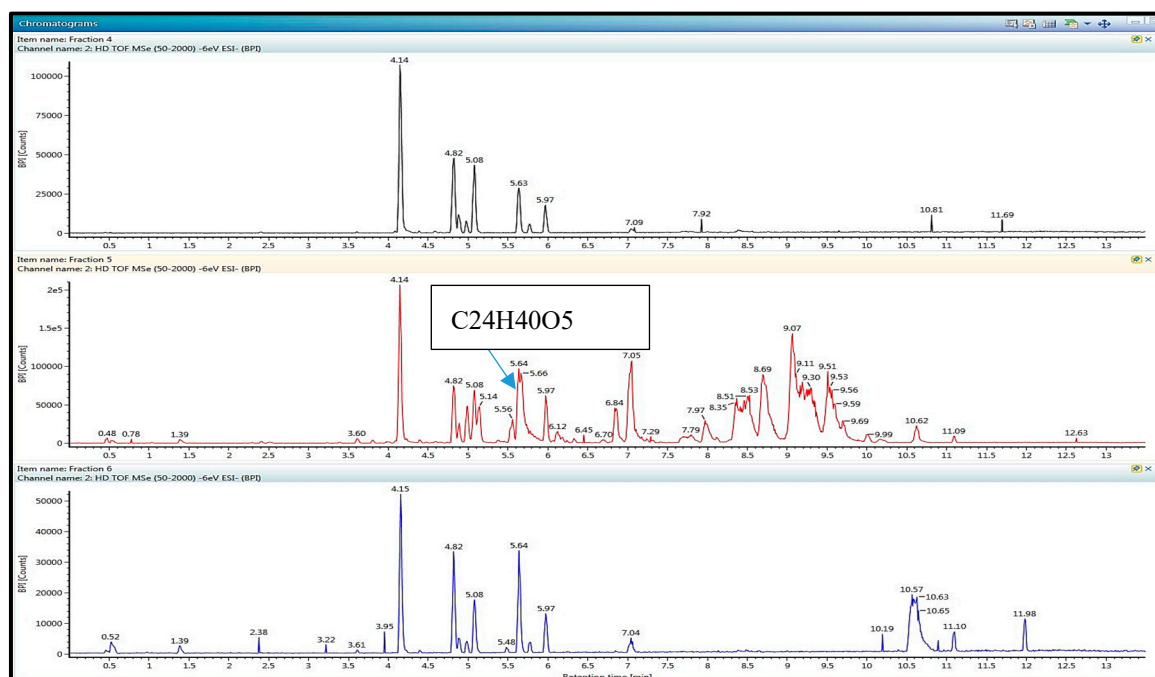

Figure S5: BPI chromatogram of active fraction 5 and inactive fractions 4 and 6 analysed in negative ionization using UHPLC-HR-MS showing compound 1 with elemental composition C<sub>24</sub>H<sub>40</sub>O<sub>5</sub>.

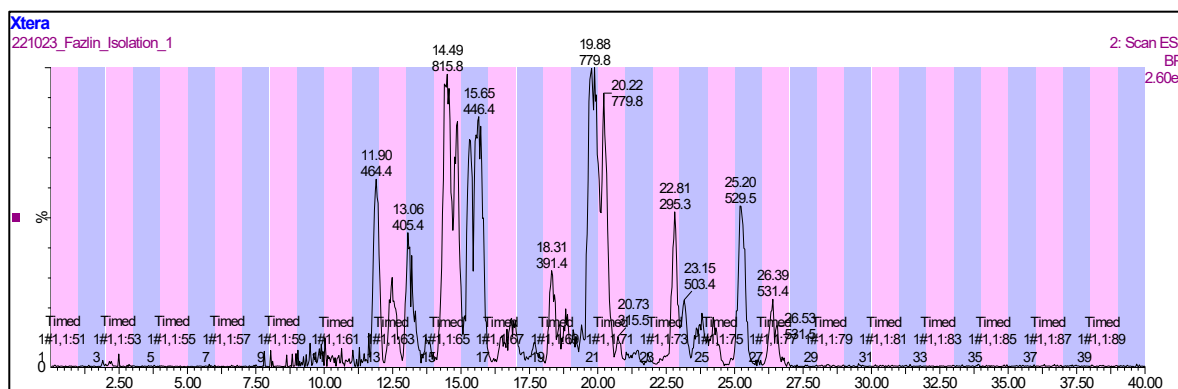

Figure S6: BPI chromatogram of the initial isolation of compound 1 from Fraction 5 separated over an Xterra RP C18 column using mass as fraction triggers.

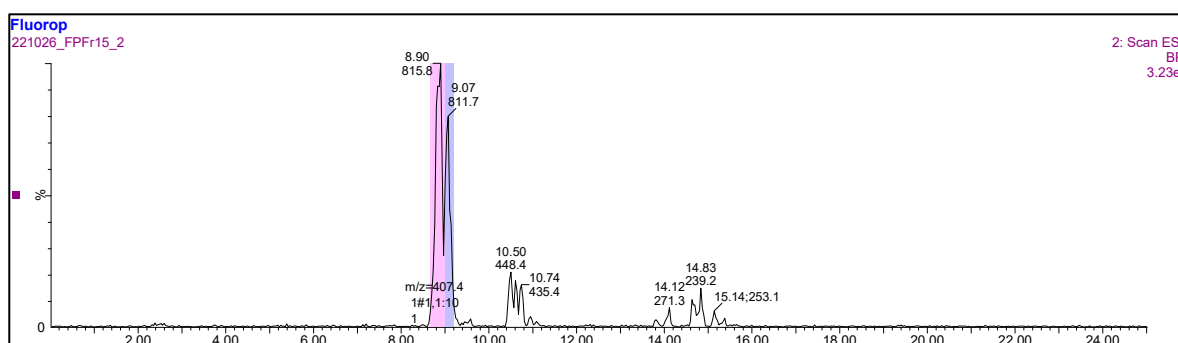

Figure S7: BPI chromatogram of the second isolation of compound 1 (dimer 815.8) and the co-eluting compound 2 (dimer 811.7) separated over a RP fluorophenyl HPLC column using mass as a fraction trigger.

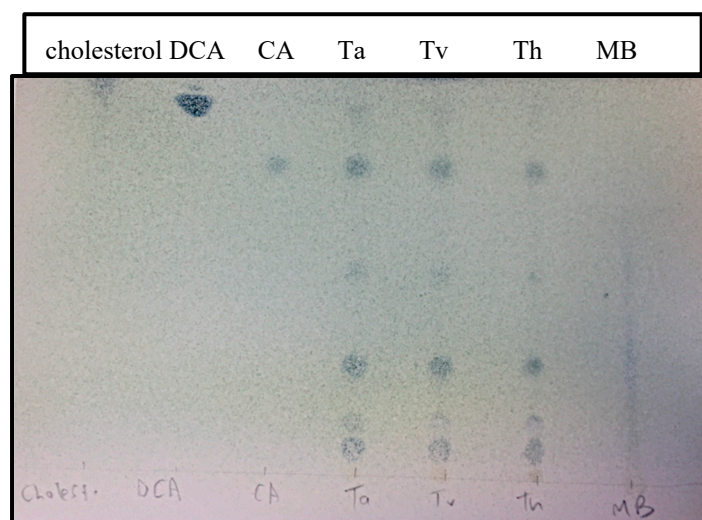

Figure S8: TLC chromatogram of the methanol extract of *T. actiniarum* (Ta), *T. viridans* (Tv) and *T. haliotis* (Th) developed alongside a cholic acid standard (0.1 µg), cholesterol standard (0.1 µg) and a deoxycholic acid (DCA) standard (0.5 µg). Marine broth was used as a control and prepared in the same way as the methanol extract.

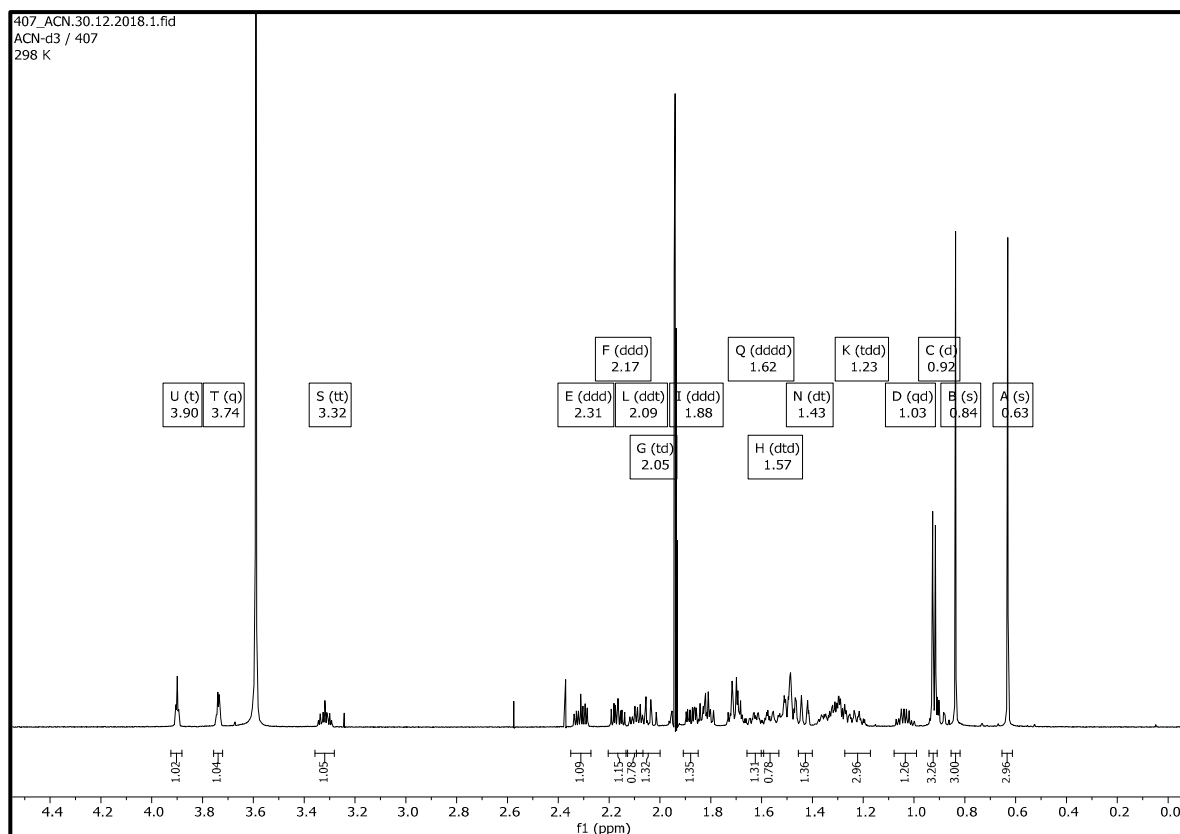

Figure S9: 1D Proton NMR spectrum for compound 1

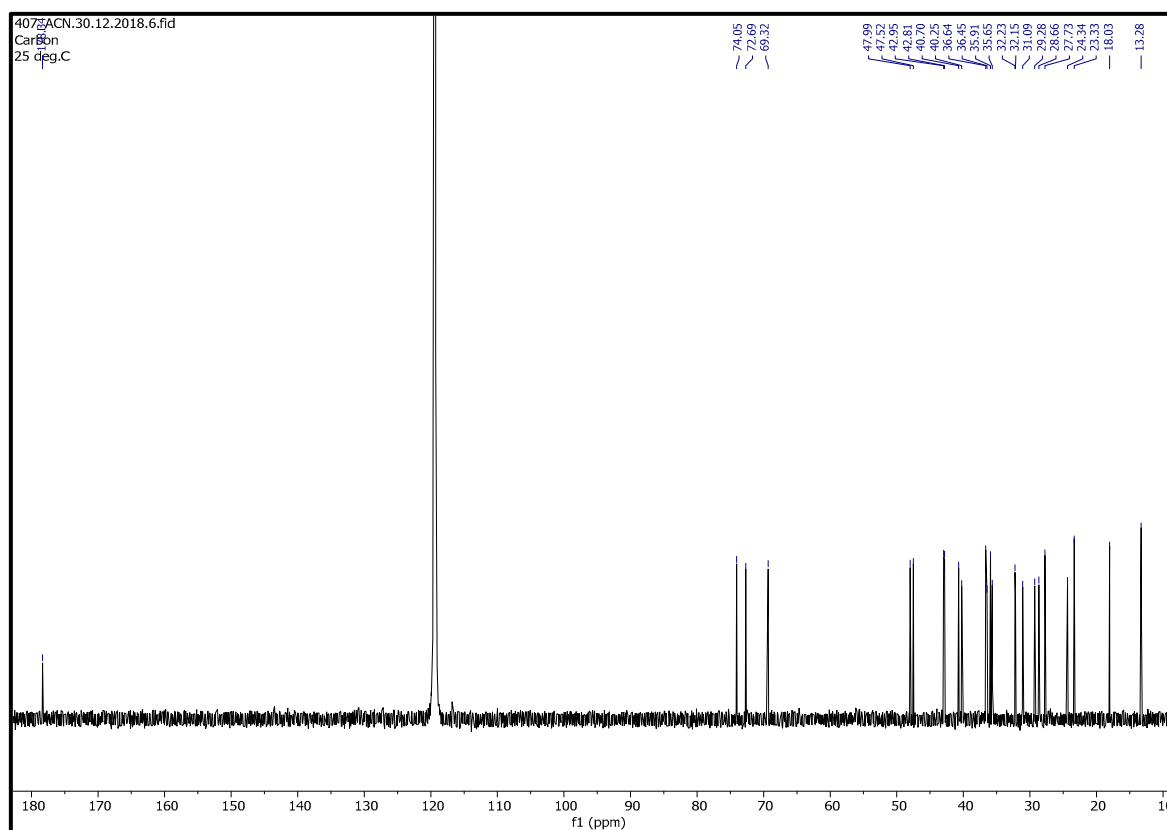

Figure S10: 1D Carbon NMR spectrum for compound 1



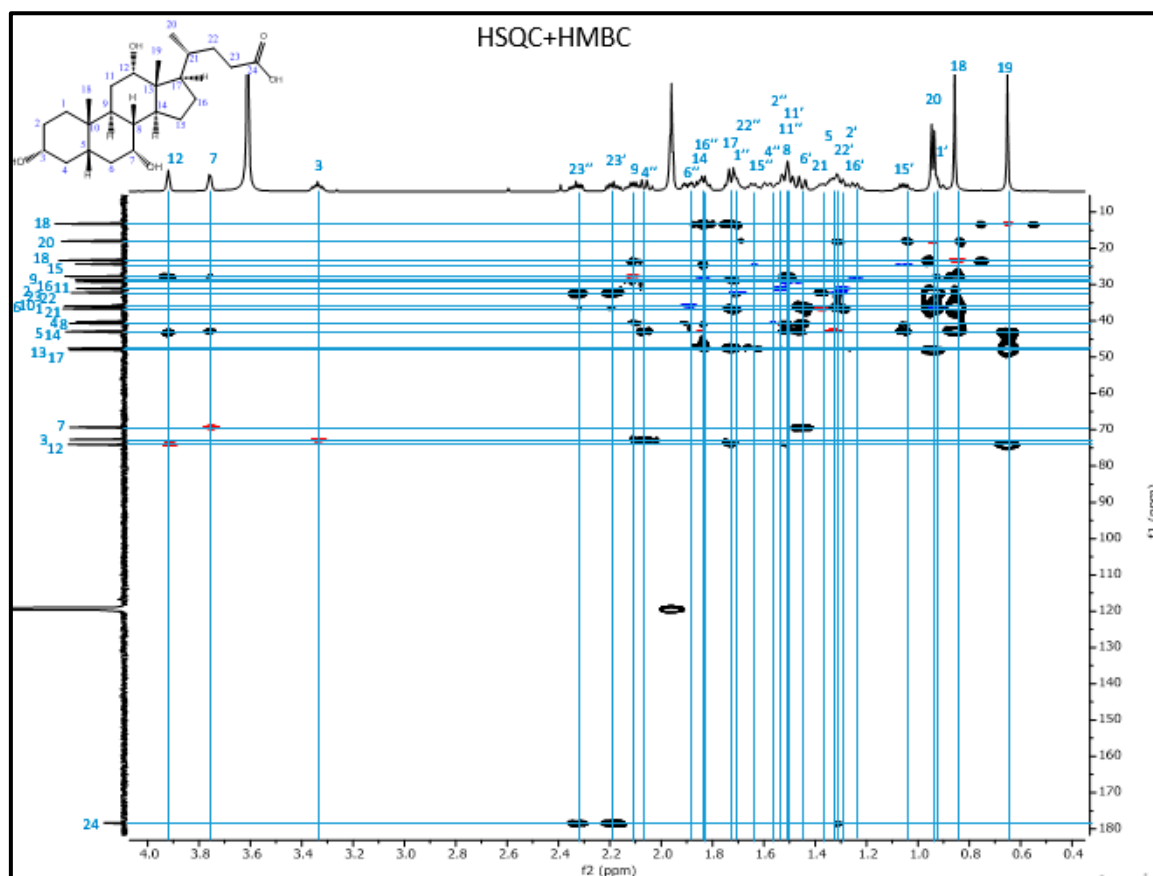

Figure S11: HSQC (red) and HMBC (blue+black) spectrum of compound 1

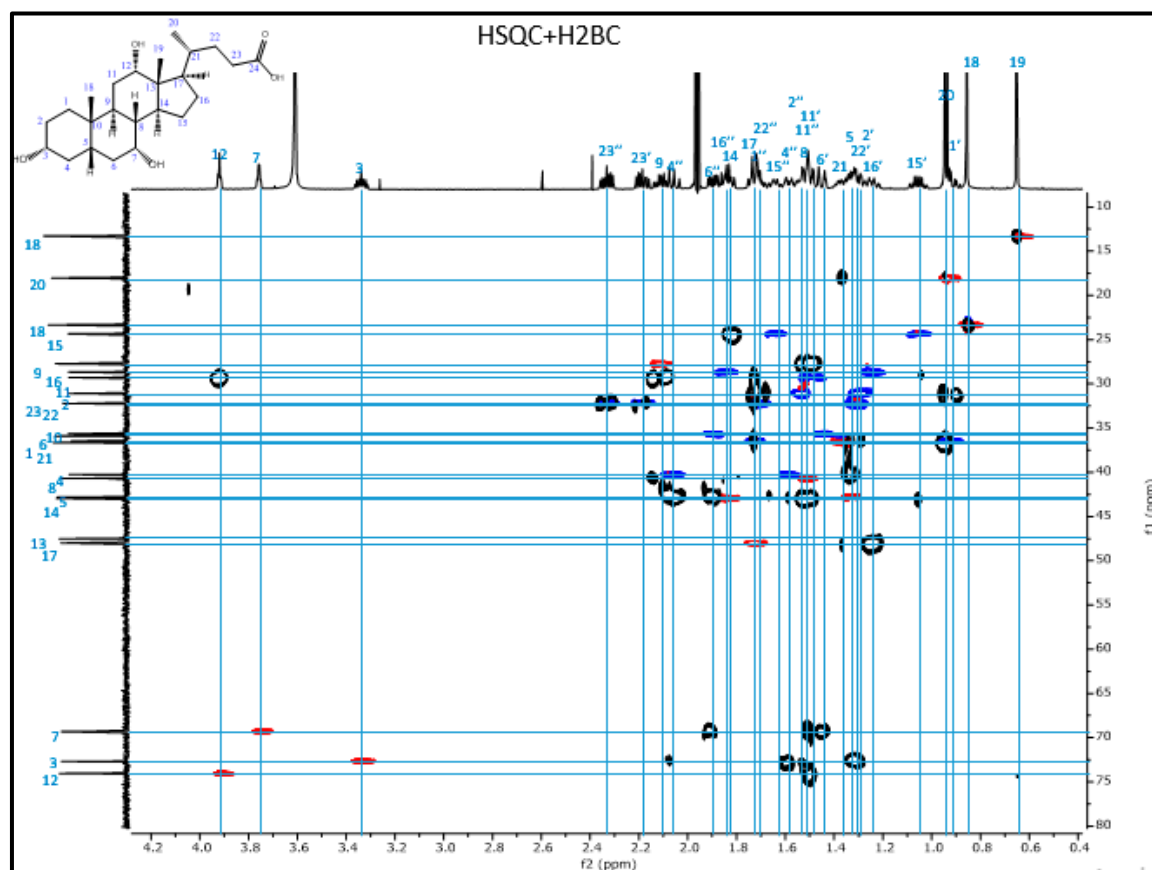

Figure S12: HSQC (red) and H2BC (blue+black) spectrum of compound 1

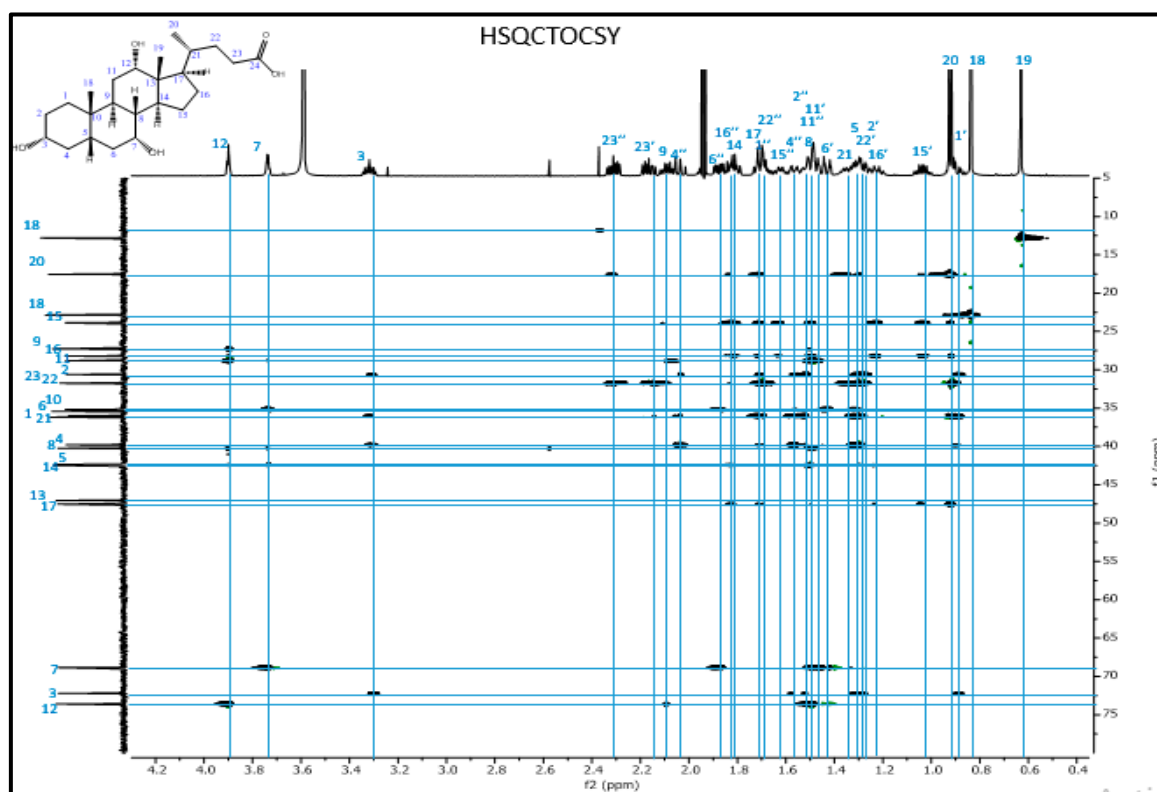

Figure S13: HSQC-TOCSY spectrum of compound 1

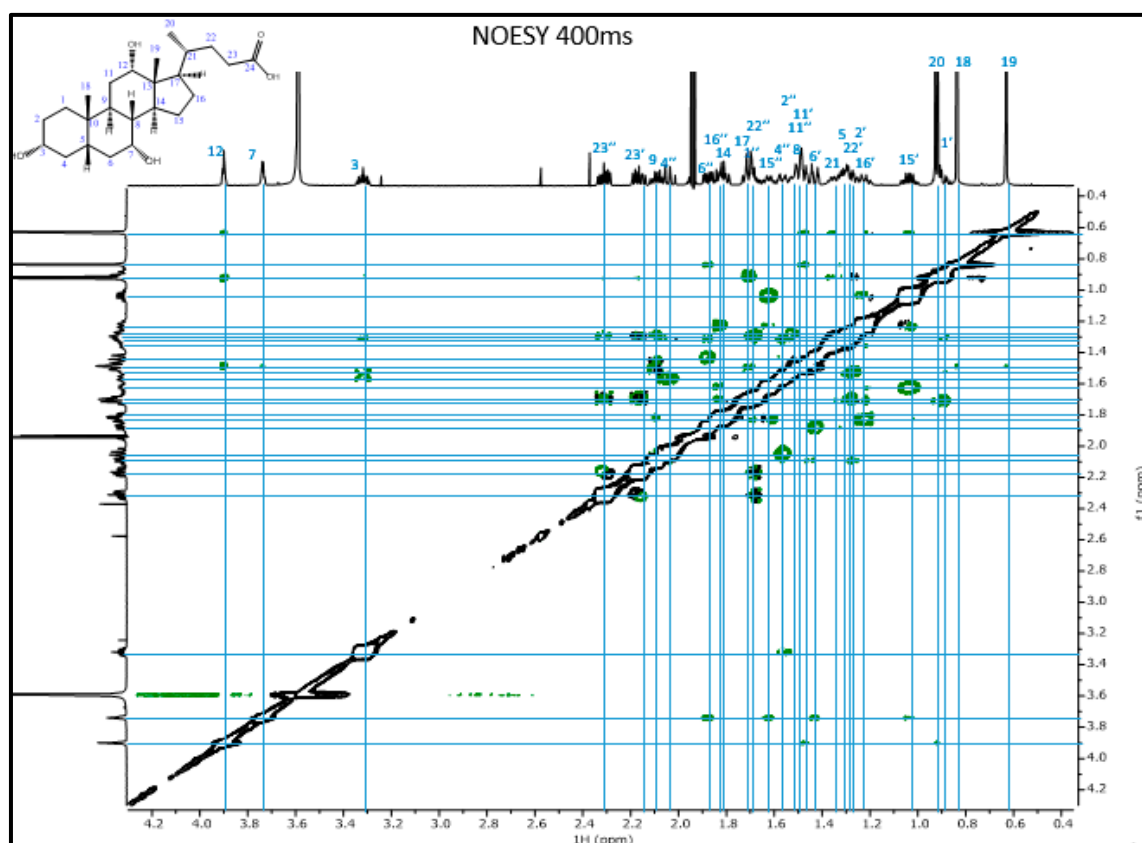

Figure S14: NOESY (400 ms mixing time) spectrum of compound 1

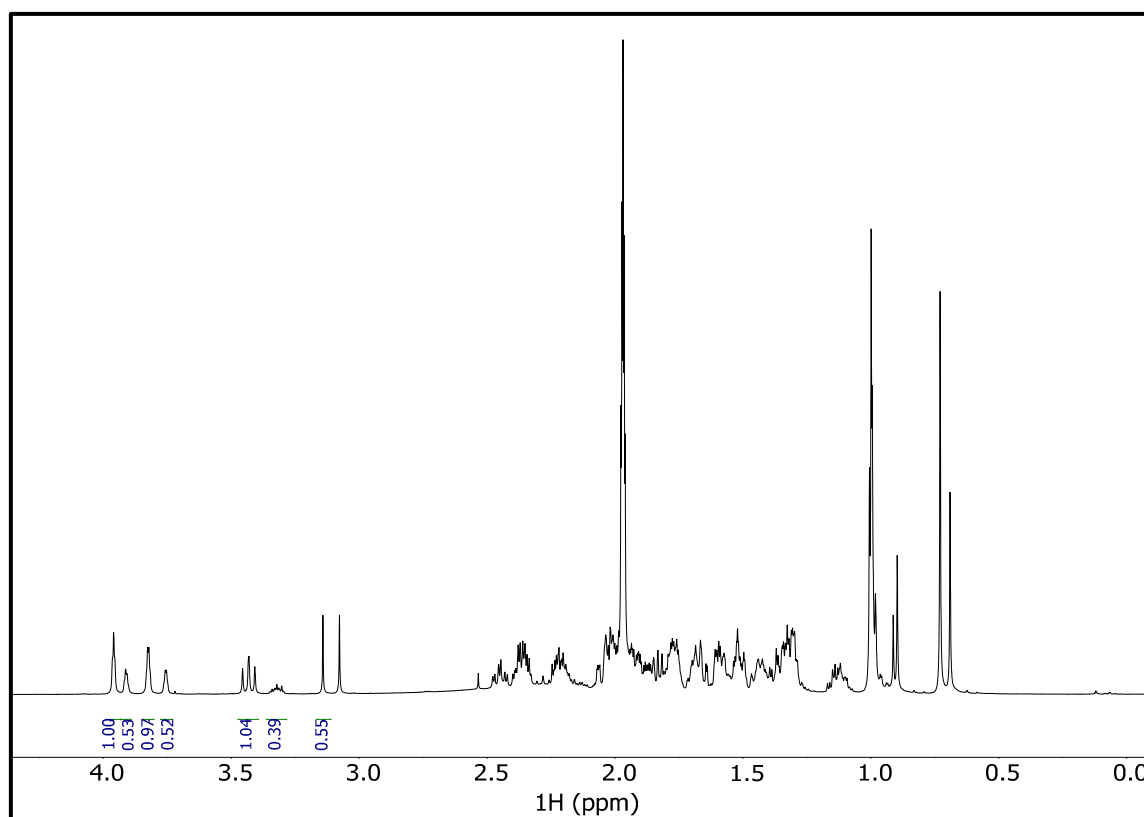

Figure S15: 1D Proton NMR spectrum for compound 2

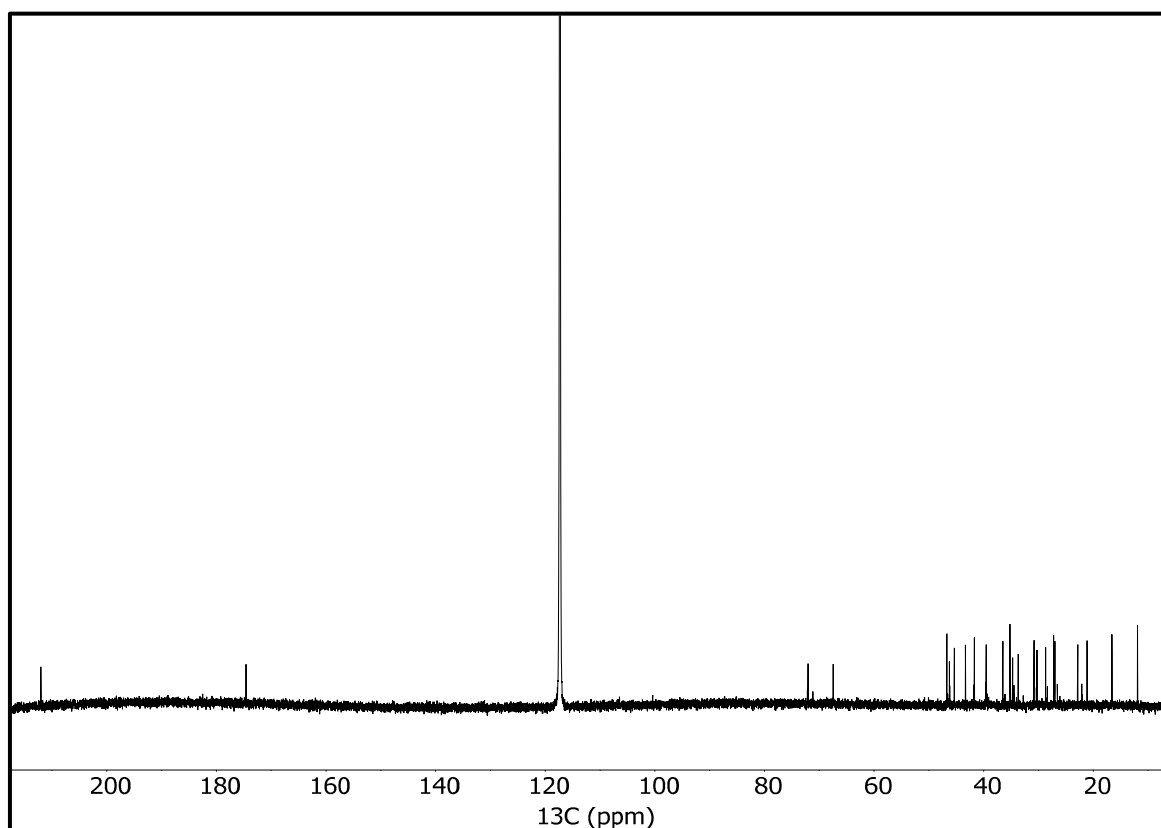

Figure S16: 1D Carbon NMR spectrum of compound 2

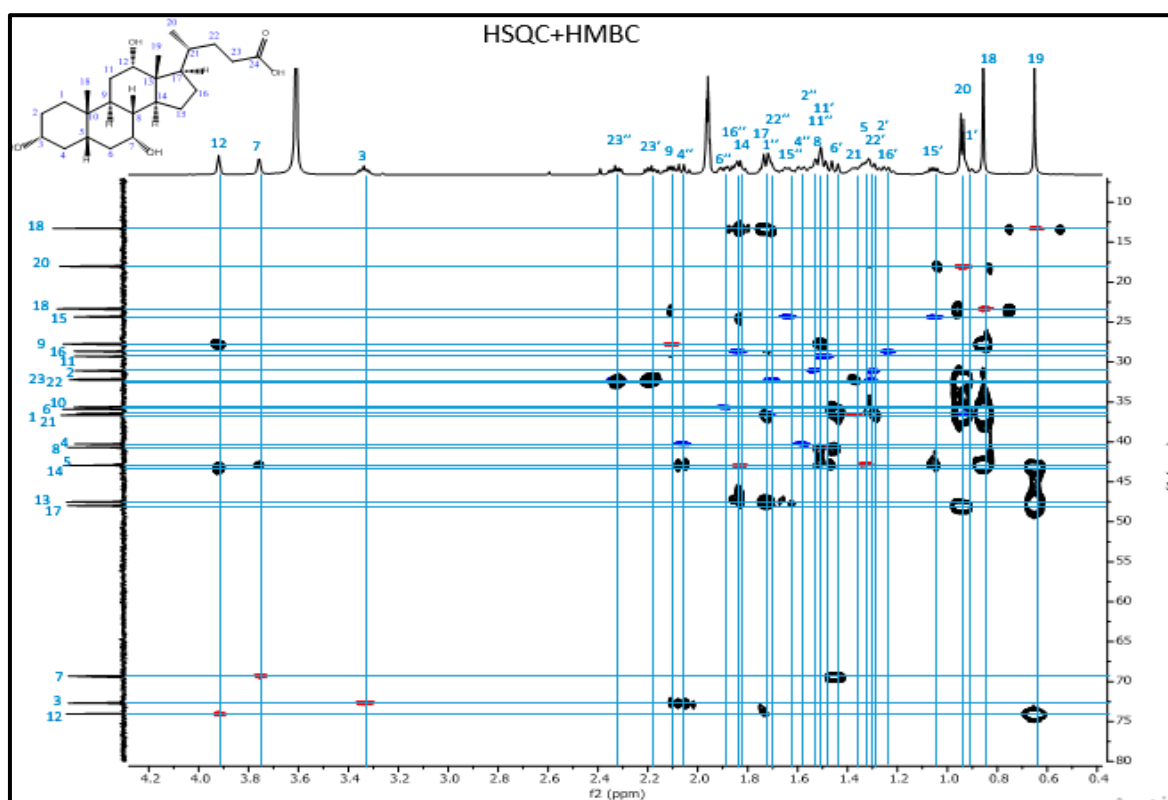

Figure S17: HSQC-HMBC spectrum of compound 2

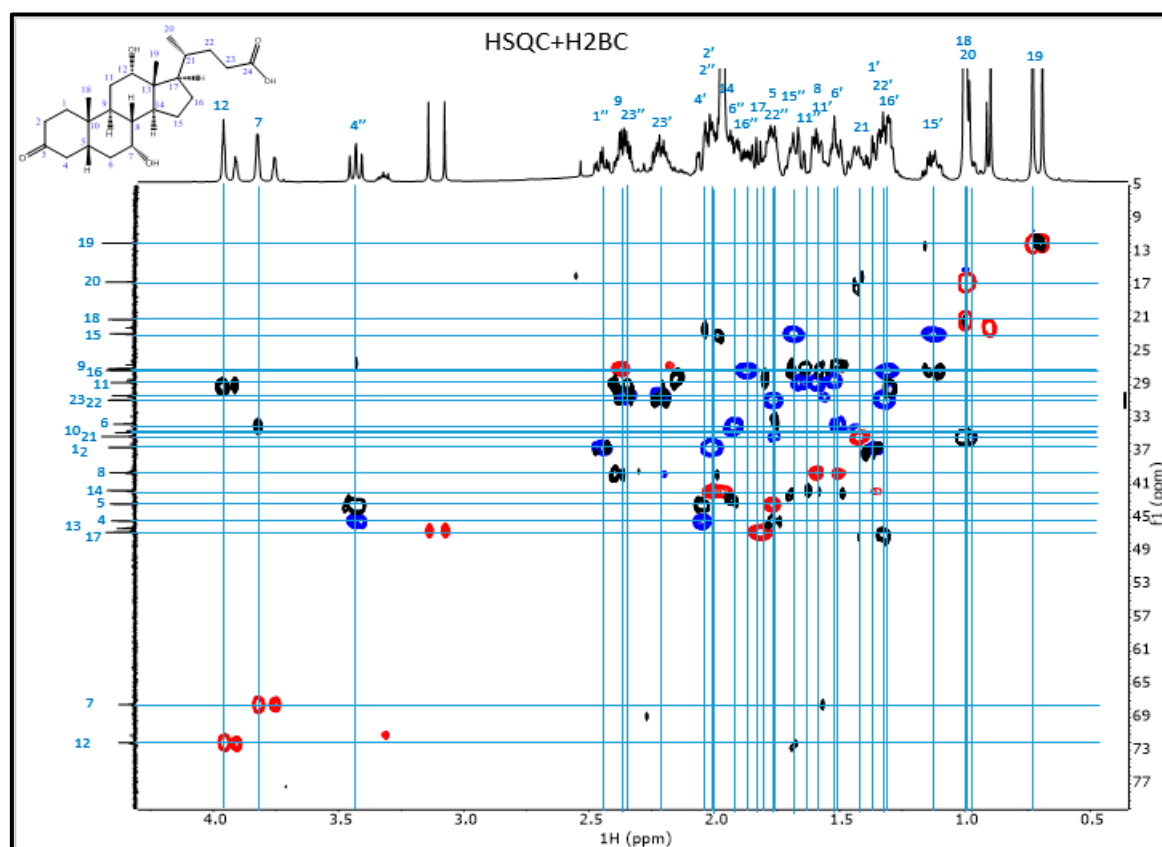

Figure S18: HSQC (red) and H2BC (blue+black) spectrum of compound 2

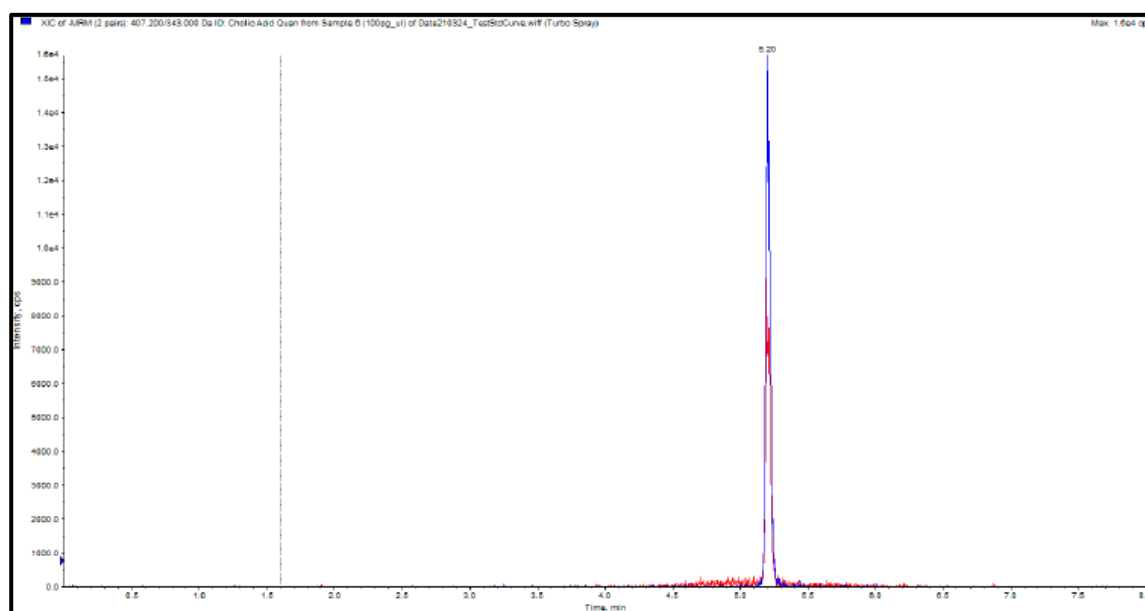

Figure S19: Standard curve of the cholic acid standard (1000pg) with a retention time of 5.20mins.

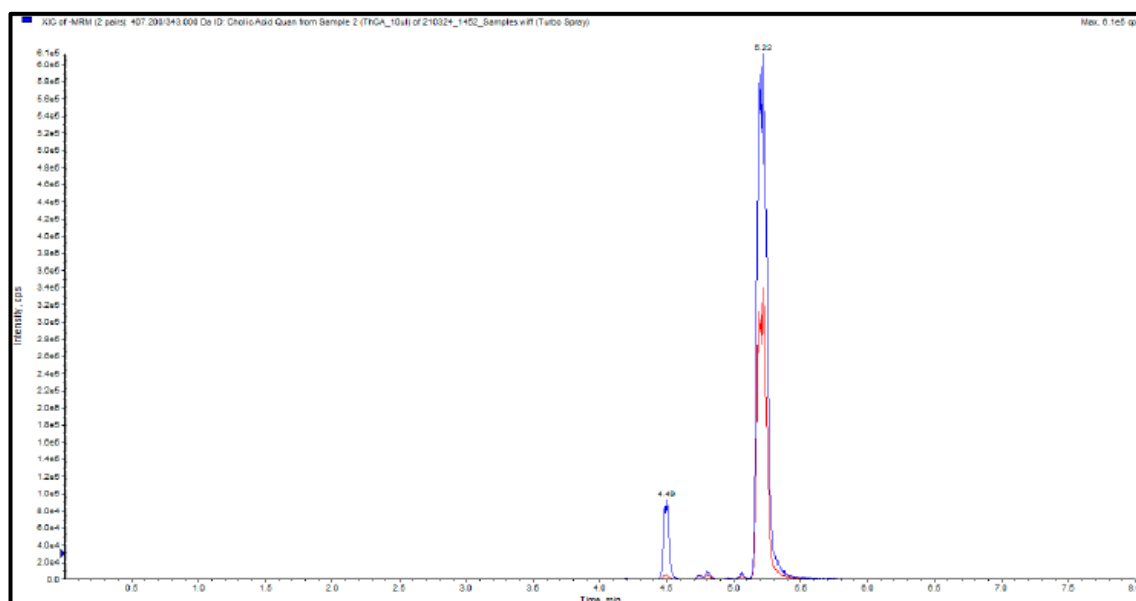

Figure S20: Retention time chromatogram of cholic acid isolated from *T. haliotis* with a retention time of 5.22mins.

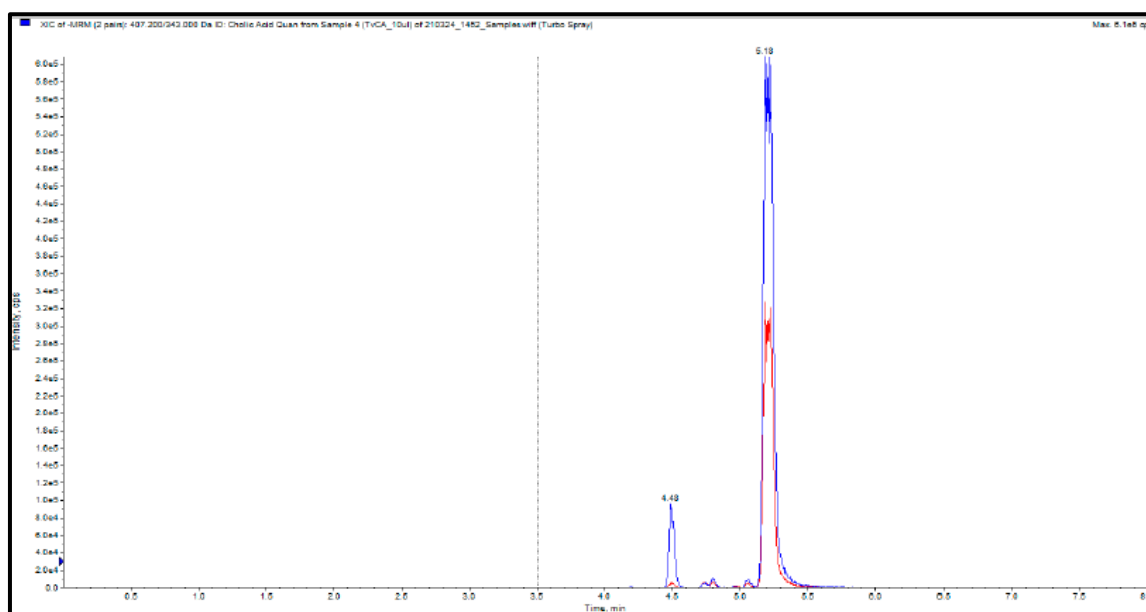

Figure S21: Retention time chromatogram of cholic acid isolated from *T. viridans* with a retention time of 5.18mins.

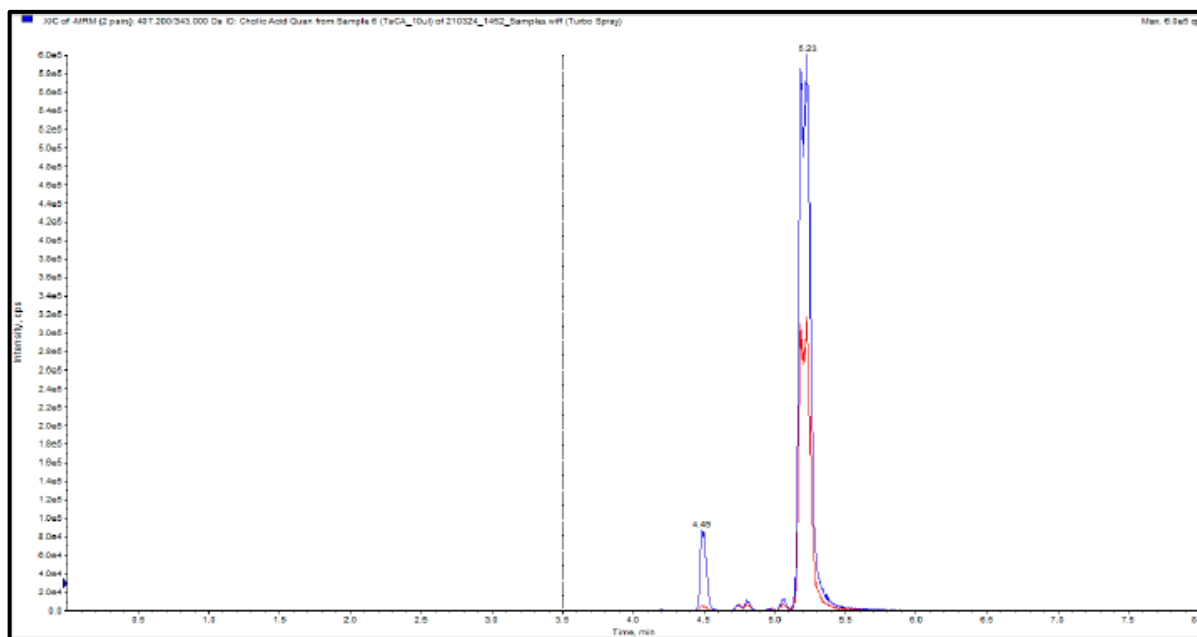

Figure S22: Retention time chromatogram of cholic acid isolated from *T. actinarius* with a retention time of 5.22mins.

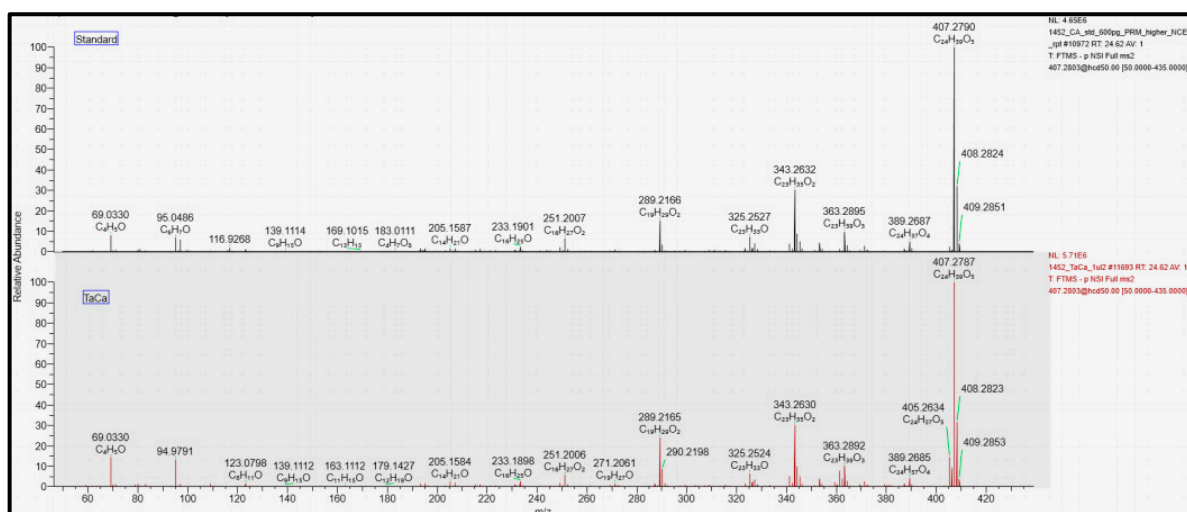

Figure S23: Comparison of full scan ( $m/z$  50-435) negative-ion mass spectrum of cholic acid (standard) and cholic acid isolated from *T. actinarius* (using preparative TLC).



|                |                                   |                                   |                    |        |        |
|----------------|-----------------------------------|-----------------------------------|--------------------|--------|--------|
| BAF94155.1     | --EQTAFV-SDMQSKLLARAARITTPETNPRDL | SGWGLGKDKTENGGRMVGNPF             | 288                | Aac    |        |
| TACT_08755     | -INNTSFI-AGLRQNIHQADSFTPPNQHRDNL  | SGWGLGKDKTENGGRVLNPF              | 283                |        |        |
| THAL_08470     | -TAHNPLI-ANLQONVQQRASLFSMPDQEHGDL | SGWGLGKDKTENGGRVLNPF              | 281                |        |        |
| TVIR_20855     | -PSHDKLL-TGLRQNIHQAGNFTIPDQEHGDL  | SGWGLGKDKTENGQGILLNPF             | 282                |        |        |
| BAV56778.1     | -AFE-PGR-----TRAPSLQVGGELGV       | SNMYGFGTAATGEGSGVLFGNPF           | 259                | MacQ*  |        |
| AAG05773.1     | -SGEQAFQ-----VAEQ-RRQRFRLER       | GNIAVGSERSADGKGMLLNPF             | 242                | pvdQ   |        |
| AAV37014.1     | -QQAQALQ-----LAAA-RNQRFALES       | GNAVAIGRELSANGRMLLNPF             | 249                | HacA   |        |
| WP_010889514.1 | --APRPDL-----AAFNRQYRFNDLP        | IGNGWAFGSEATTNGRGLLLGNPF          | 251                | QqaR   |        |
| AAO41113.1     | -PPQAVDT-----VALDRELRLRDLPI       | IGNGWAFGADATANRRGVLLGNPF          | 258                | AiiD   |        |
| WP_011002462.1 | -PPHAVDV-----AALDRELRLRDLPI       | IGNGWAFGSAATENRRGVLLGNPF          | 259                | RsAac  |        |
| WP_043523659.1 | ---EAPDA-----AAIAAALDGTSA         | IGNAYGLGAQATVNGSGMVLANPF          | 251                | AuAAC* |        |
| BAF51977.1     | --VADPAA-----AARAYFAARHDTGM       | GNNAVAFSGAATANRRGLLLGNPF          | 270                | SmPVA  |        |
| AAU09670.1     | --PKEAAA-----AAQ-RLNSTQNA         | DMGNNAVAFRGSTANGRGLLLGNPF         | 267                | SlPA*  |        |
| AAT68473.1     | --PEEAAS-----AAK-RLLSAQNA         | DMGNNAVAFDGSTTVNGRGLLLGNPF        | 265                | AhlM*  |        |
| BAD07025.1     | --PEEAAT-----AAE-RLNSTQNA         | DMGNNAVAFDGSTTVNGRGLLLGNPF        | 265                | SsCLA  |        |
| TVIR_22915     | -----NGTAALS-GKTQA--QTYQDQAL      | PGSNNAVAVSGKLSENGSAAILANDMHLNL    | 285                |        |        |
| THAL_06600     | -----DGAAQQT-DKVSANPFYRDQAL       | PGSNNAVAVSGKLSENGSAAILANDMHLNL    | 287                |        |        |
| TACT_06920     | -----NSTATHS-GQAQANNSLYRDQAL      | PGSNNAVAVSGKLSENGSAAILANDMHLNL    | 287                |        |        |
| AAG04421.1     | -----PGLAGVEGAARQVAA-LSML-GVA     | ASNNAIAPQRSRSRGKSLMANDTHLPL       | 290                | QuiP   |        |
| AAV39885.1     | -----LNQLAQLSHKALE-DAGLPQFEG      | SNNAWVISGSRQTSGKPILAGDPHIFR       | 273                | HacB   |        |
| BAB75623.1     | VIKEVGEIAPVLESIKKPMVALEKLIGHT     | GVGIGNNWNVISGERTATGKPILANDPHLAV   | 314                | AiiC   |        |
| AAL53453.1     | -----ISLEELRPAIEGLMKLFPHDAT       | GGSNNNAVDARHSKTGMPIVAGDPHQA       | 252                | AibP   |        |
| TACT_32120     | -----DIILGLLAQNEQVQPPQFNVG        | EGSGSNNAWVVSGETYQSGPLVLASDPHIGV   | 281                |        |        |
| ASS36259.1     | -----VALENVMRRNSQLQKQNFEG         | QYVGSNAWVISGKHSKDNMIPILANDPHLGL   | 281                | PfmA*  |        |
| TVIR_31235     | -----DILTDLALLNHHKFEDGLKIG        | GRFVGSNAWVVSGLKLTESGRPIILANDPHLGL | 284                |        |        |
| BAF94155.1     | TGNLRFQSHITIPG-----QLDMMGG        | SLVGMGPINIGFNKDLAWTHHTSTA         | EHFVMYN            | 343    | Aac    |
| TACT_08755     | TGHLRFQSHLTIPG-----VLDVMGG        | SLQGLPGVINIGFNQHIAWTHHTV          | SKSRRFVLYQ         | 338    |        |
| THAL_08470     | TGHLRFQSHITIPG-----VLDVMGG        | SLQGLPGIVNIGFNQHLAWTHHTV          | SKSRRFVLYQ         | 336    |        |
| TVIR_20855     | TGHLRFQSHVTIPG-----VLDVMGG        | SLQGLPGIVNIGFNQHIAWTHHTV          | SNRRFVLYQ          | 337    |        |
| BAV56778.1     | KGPDRFYQAQLTIDG-----EANVSG        | VSLGLP-VIQIGFNDSVAWSHTV           | STARRFGFFQ         | 313    | MacQ*  |
| AAG05773.1     | NGAMRFYQMHLTIPG-----RLDVMG        | ASLPGLP-VVNIGFSRHLAWTHHT          | DTSSHFTLYR         | 296    | pvdQ   |
| AAV37014.1     | GGGMRFYQMHLTIPG-----KLDVMG        | AALPGLP-LINIGFNQHLAWSHTV          | DTSKHFTLHR         | 303    | HacA   |
| WP_010889514.1 | ETSNRFYQLHLTLPG-----QFDVMG        | ASLGMP-VVNIGFNQDVAWTHHT           | STDKRFTLAA         | 305    | QqaR   |
| AAO41113.1     | TTNRFYQVHLTVPG-----KLDVMG         | ASIAAFP-VVSIIGNKDVAWTHHT          | STGRRFTLFE         | 312    | AiiD   |
| WP_011002462.1 | TTNRFYEVHLTVPG-----KLDVMG         | ASIAAFP-VVSIIGNRDVAWTHHT          | STGRRFTLFE         | 313    | RsAac  |
| WP_043523659.1 | QGAERFYRMHLKVPG-----RYDVEG        | AALIGDP-IIIEIGHNRTVAWSHTV         | STARRFVWHR         | 305    | AuAAC* |
| BAF51977.1     | HGNRRFYQSQTIPG-----ELNVG          | ASLLGSP-TVQIGHNASMAWSHTV          | ATGVPMNLYE         | 324    | SmPVA  |
| AAU09670.1     | DGGRRFYQSQTIPG-----ELNVAG         | SLLGST-TVSIGNNADVAWSHTV           | ATGVTNLNHQ         | 321    | SlPA*  |
| AAT68473.1     | QGGRRFYQSQTIPG-----ELNVG          | ASLLGAT-TMSIGNNPDVAWSHTV          | ATGVTNLNHQ         | 319    | AhlM*  |
| BAD07025.1     | QGGRRFYQAQTIPG-----ELNVG          | ASLLGAT-TISIGNNADVAWSHTV          | ATGVTNLNHQ         | 319    | SsCLA  |
| TVIR_22915     | RVPNTWYRASLEYKS-HEHEAVKVTG        | VSLPGTPS-IIAGSNGDIAGWFTNSY        | GDWSDVIL           | 343    |        |
| THAL_06600     | RVPNTWYRTSLEYRN-HENQAVKVTG        | VSLPGAPS-IIAGSNGNIAGWFTNSY        | GDWSDVIL           | 345    |        |
| TACT_06920     | RVPNTWYRASLEYRN-HENQAVKVTG        | VSLPGAPS-IIAGSNGDIAGWFTNSY        | GDWSDVIL           | 345    |        |
| AAG04421.1     | SMPSVWNYVQIRSP-----KYQAAG         | VSIAGLPV-VVAGFNGKLAWGMTV          | LVLDGNQDLYL        | 343    | QuiP   |
| AAV39885.1     | SVPSVWYEAQLSAP-----GFELYG         | -HFPALNPFAALLGHNMDFGWSLT          | MFQNDVLDLIA        | 326    | HacB   |
| BAB75623.1     | QMPSIWIYEVALHCIKQTD               | DCPYNVSGFSFPGMLG-VIVGHS           | DRIAWGTNTQGDVMDLYI | 373    | AiiC   |
| AAL53453.1     | EIPGMYAQIHLTCD-----SFDVLG         | LSVPGVPGFPHFAHNEEMAWCVTH          | AFADIHDLV          | 306    | AibP   |
| TACT_32120     | EIPAVWYLAELIQGD-----ELHVT         | GATYPGAPI-VLMGQNESIAGWTT          | NMLADAQDLYV        | 334    |        |
| ASS36259.1     | QIPSYWYALSQQGE-----HLSAK          | GMGLVGTPPL-IIFGQNDHISWGGT         | NMMADVQDLYF        | 334    | PfmA*  |
| TVIR_31235     | QIPSLWYAVSQQGD-----TVSAG          | MSLVGLPL-VIFGKNEHIAWGGT           | NMMADVQDLYL        | 337    |        |

Figure S24: Amino acid sequence alignment of putative penicillin acylases from *Thalassomonas* sp. with AHL acylase homologues. Only regions with conserved residues involved in autoproteolytic cleavage and catalysis are depicted here and residues are highlighted in yellow. The amino acid sequence of the acylases from *Thalassomonas* sp. are depicted in bold. Amino acid sequences in pink depict group A AHL acylases while those in blue depict group B AHL acylases. Acylases with an asterisk are reported to have both AHL acylase and penicillin acylase activity.
